# Supplementary material for: Implementation and utilization of the molecular tumor board to guide precision medicine
Source: PubMed Central journal article supplement (PMC5593688; doi:10.18632/oncotarget.18471), 2017-06-14
Supplement: oncotarget-08-57845-s001.pdf [file oncotarget-08-57845-s001.pdf]

## Implementation and utilization of the molecular tumor board to guide precision medicine

### Supplementary Materials

**Supplementary Table 1: Cases with potentially clinically actionable genes.** See Supplementary\_Table\_1

**Supplementary Table 2: Cases with cancer related gene alterations, but not clinically actionable.** See Supplementary\_Table\_2

### Supplementary Table 3: Cases without level 1–3 mutations

| Diagnosis                                                | Primary Location |
|----------------------------------------------------------|------------------|
| Metastatic carcinoma in brain                            | Unknown          |
| Primary CNS PNET                                         | Brain            |
| Skull base chordoma                                      | Brain            |
| Pineal parenchymal tumor of intermediate differentiation | Brain            |
| Metastatic breast cancer                                 | Breast           |
| Sarcoma with histiocytic differentiation in breast       | Breast           |
| Hurtle cell carcinoma, metastatic                        | Thyroid          |
| Metastatic adenoid cystic carcinoma                      | Salivary gland   |
| Metastatic adenoid cystic carcinoma                      | Salivary gland   |
| Adenoid cystic carcinoma                                 | Salivary gland   |
| Clear cell papillary renal cell carcinoma                | Kidney           |
| Upper urinary tract squamous cell carcinoma              | Urinary tract    |
| Poorly differentiated carcinoma, favor small cell        | Pancreas         |
| Papillary serous adenocarcinoma                          | GYN              |
| Recurrent granulosa cell tumor                           | GYN              |
| Carcinosarcoma of ovary, metastasis to brain             | GYN              |
| Neuroendocrine tumor, uterine origin                     | GYN              |
| Endometrioid carcinoma, metastatic                       | GYN              |
| Leiomyosarcoma, recurrent                                | GYN              |
| Papillary serous carcinoma, recurrent                    | GYN              |
| Papillary serous carcinoma, recurrent                    | GYN              |
| Endometrial adenocarcinoma to colon                      | GYN              |

**Supplementary Table 4: Cases tested for foundation one**

|   | <b>Age, Sex</b> | <b>Diagnosis</b>                                                       | <b>Foundation One Results</b>                                                                                                          |
|---|-----------------|------------------------------------------------------------------------|----------------------------------------------------------------------------------------------------------------------------------------|
| 1 | 33F             | Spindle cell neoplasm with metastasis                                  | <i>KRAS</i> amp, <i>CCND2</i> amp, <i>CDK4</i> amp, <i>MDM2</i> amp, <i>FGF23</i> amp, <i>FGF6</i> amp, <i>KDM5A</i> amp               |
| 2 | 45M             | Myxoid liposarcoma vs extraskeletal myxoid chondrosarcoma              | <i>EWSR1</i> fusion; <i>PIK3CA</i> mutation (subclone)                                                                                 |
| 3 | 40F             | Metastatic follicular dendritic cell sarcoma                           | <i>HDAC1</i> E396D, <i>TP53</i> R248W, <i>EWSR1-OSM</i> fusion, <i>SETBP1</i> G870D                                                    |
| 4 | 56F             | Pituitary adenoma, recurred path shows rhabdomyosarcoma                | <i>FGFR1</i> amp, <i>MYC</i> amp, <i>MYST3</i> amp, <i>ZNF703</i> amp                                                                  |
| 5 | 60F             | Papillary serous ca with metastasis, recurrent                         | <i>KRAS</i> G12V, <i>TP53</i> P278H                                                                                                    |
| 6 | 54F             | Triple negative breast cancer, now metastasis to lung, liver and brain | <i>HRAS</i> G12S, <i>PIK3CA</i> E545N, N1044S, <i>CCND3</i> amp, <i>MYC</i> amp (equivocal), <i>TP53</i> A79fs*44, <i>RBI</i> N328fs*4 |

F, female; amp = amplification.
